# Supplementary material for: Actin dynamics tune the integrated stress response by regulating eukaryotic initiation factor 2α dephosphorylation
Source: eLife journal article supplement (doi:10.7554/elife.04872), 2015-03-16
Supplement: supp [file elife-04872-supp-v1.zip › elife_poa_e04872_Figure_1_figure_supplement_1.pdf]

Figure 1 supplement 1

|          | Total spectrum count |              |              | Total unique peptide count |              |              | Percent coverage |              |              |
|----------|----------------------|--------------|--------------|----------------------------|--------------|--------------|------------------|--------------|--------------|
|          | GFP                  | GFP-PPP1R15B | GFP-PPP1R15A | GFP                        | GFP-PPP1R15B | GFP-PPP1R15A | GFP              | GFP-PPP1R15B | GFP-PPP1R15A |
| PP1CA    | 2                    | 108          | 59           | 2                          | 30           | 23           | 7                | 78           | 62           |
| PP1CB    | 0                    | 66           | 40           | 0                          | 23           | 17           | 0                | 61           | 40           |
| PP1CC    | 0                    | 87           | 34           | 0                          | 23           | 18           | 0                | 60           | 48           |
| HSPA8    | 8                    | 105          | 54           | 5                          | 34           | 26           | 7                | 51           | 41           |
| HSPA1A   | 19                   | 91           | 59           | 10                         | 34           | 23           | 16               | 47           | 33           |
| HSPA2    | 0                    | 37           | 18           | 0                          | 15           | 8            | 0                | 14           | 11           |
| HSPA6    | 0                    | 31           | 0            | 0                          | 14           | 0            | 0                | 15           | 0            |
| ACTB     | 13                   | 148          | 79           | 7                          | 30           | 26           | 12               | 57           | 58           |
| ACTG1    | 12                   | 133          | 73           | 6                          | 26           | 21           | 16               | 57           | 58           |
| ACTBL2   | 2                    | 27           | 13           | 1                          | 8            | 4            | 4                | 14           | 14           |
| ACTA2    | 6                    | 50           | 33           | 3                          | 14           | 12           | 7                | 21           | 27           |
| TUBB     | 23                   | 52           | 109          | 16                         | 26           | 45           | 31               | 51           | 62           |
| TUBB4B   | 19                   | 37           | 79           | 12                         | 19           | 26           | 28               | 51           | 62           |
| TUBB2A   | 17                   | 31           | 71           | 10                         | 15           | 23           | 22               | 40           | 52           |
| TUBB6    | 8                    | 15           | 34           | 4                          | 6            | 12           | 7                | 14           | 29           |
| TUBB4A   | 16                   | 28           | 59           | 9                          | 13           | 20           | 21               | 35           | 51           |
| TUBA1C   | 16                   | 33           | 66           | 9                          | 17           | 23           | 24               | 44           | 63           |
| TUBA1B   | 17                   | 41           | 74           | 10                         | 20           | 25           | 27               | 48           | 63           |
| TUBA4A   | 8                    | 28           | 54           | 6                          | 14           | 19           | 15               | 29           | 47           |
| HADHB    | 0                    | 81           | 44           | 0                          | 29           | 19           | 0                | 49           | 50           |
| HADHA    | 0                    | 247          | 82           | 0                          | 51           | 41           | 0                | 67           | 51           |
| PRKDC    | 9                    | 74           | 82           | 9                          | 62           | 65           | 3                | 17           | 18           |
| EIF2S1   | 2                    | 70           | 18           | 2                          | 30           | 12           | 7                | 71           | 50           |
| EIF2S2   | 2                    | 49           | 16           | 2                          | 25           | 15           | 5                | 59           | 46           |
| EIF2S3   | 1                    | 53           | 23           | 1                          | 21           | 15           | 2                | 49           | 31           |
| IRS4     | 0                    | 40           | 40           | 0                          | 29           | 22           | 0                | 24           | 18           |
| DYNC1H1  | 9                    | 36           | 27           | 9                          | 34           | 24           | 2                | 9            | 6            |
| EEF1A1   | 14                   | 26           | 24           | 10                         | 12           | 13           | 3                | 31           | 30           |
| AIFM1    | 0                    | 8            | 34           | 0                          | 7            | 19           | 0                | 14           | 35           |
| CAD      | 2                    | 14           | 29           | 2                          | 14           | 21           | 1                | 8            | 11           |
| SMC2     | 1                    | 7            | 23           | 1                          | 7            | 20           | 1                | 8            | 21           |
| DNAJA1   | 2                    | 17           | 22           | 2                          | 11           | 12           | 4                | 33           | 34           |
| TCP1     | 3                    | 11           | 20           | 3                          | 10           | 12           | 4                | 23           | 25           |
| TCP1beta | 2                    | 15           | 16           | 2                          | 10           | 13           | 4                | 25           | 36           |
