# Supplementary material for: Actin dynamics tune the integrated stress response by regulating eukaryotic initiation factor 2α dephosphorylation
Source: eLife journal article supplement (doi:10.7554/elife.04872), 2015-03-16
Supplement: supp [file elife-04872-supp-v1.zip › elife_poa_e04872_Figure_1_figure_supplement_2.pdf]

Figure 1 supplement 2

|              | Total spectrum count |             | Total unique peptide count |             | Percent coverage |             |
|--------------|----------------------|-------------|----------------------------|-------------|------------------|-------------|
|              | V5                   | dPPP1R15-V5 | V5                         | dPPP1R15-V5 | V5               | dPPP1R15-V5 |
| Act5C        | 20                   | 203         | 13                         | 39          | 22               | 69          |
| Act87E       | 9                    | 137         | 6                          | 25          | 17               | 46          |
| Hsc70-4      | 3                    | 73          | 2                          | 34          | 4                | 51          |
| Filamin-A    | 1                    | 31          | 1                          | 30          | 1                | 19          |
| Viking       | 2                    | 28          | 2                          | 23          | 1                | 18          |
| alphaCOP     | 0                    | 24          | 0                          | 19          | 0                | 14          |
| Hsp70Ab      | 0                    | 21          | 0                          | 15          | 0                | 29          |
| Cg25C        | 1                    | 21          | 1                          | 18          | 1                | 14          |
| Hsc70-3      | 1                    | 21          | 1                          | 15          | 2                | 26          |
| Hsp70Ba      | 0                    | 20          | 0                          | 14          | 0                | 28          |
| Misshapen    | 0                    | 19          | 0                          | 13          | 0                | 12          |
| AT02348p     | 0                    | 17          | 0                          | 12          | 0                | 31          |
| lost         | 0                    | 13          | 0                          | 11          | 0                | 40          |
| Hsp68        | 0                    | 12          | 0                          | 8           | 0                | 13          |
| Ef1 alpha48D | 4                    | 12          | 3                          | 7           | 10               | 19          |
| ncd          | 0                    | 12          | 0                          | 8           | 0                | 16          |
| betaTub56D   | 1                    | 11          | 1                          | 8           | 3                | 23          |
| CG9674_F     | 0                    | 10          | 0                          | 10          | 0                | 6           |
| Hsp23        | 0                    | 9           | 0                          | 5           | 0                | 37          |
| RpS3A        | 0                    | 9           | 0                          | 6           | 0                | 23          |
| kst          | 0                    | 8           | 0                          | 8           | 0                | 2           |
| alphaTub84B  | 1                    | 7           | 1                          | 6           | 3                | 20          |
| RpL11        | 0                    | 7           | 0                          | 6           | 0                | 26          |
| Dscam1       | 0                    | 7           | 0                          | 7           | 0                | 4           |
| Pp1-87B      | 0                    | 7           | 0                          | 5           | 0                | 27          |
| RpL19        | 0                    | 7           | 0                          | 5           | 0                | 25          |
| betaTub60D   | 0                    | 6           | 0                          | 5           | 0                | 12          |
| elf4G        | 0                    | 6           | 0                          | 6           | 0                | 5           |
| Rm62         | 1                    | 6           | 1                          | 6           | 2                | 11          |
| Ef1 gamma    | 1                    | 6           | 1                          | 5           | 3                | 16          |
| RpS8         | 0                    | 6           | 0                          | 6           | 0                | 34          |
| Vps13        | 0                    | 5           | 0                          | 5           | 0                | 2           |
| poe          | 0                    | 5           | 0                          | 5           | 0                | 1           |
| Droj2        | 0                    | 5           | 0                          | 5           | 0                | 14          |
