# Supplementary figures and images for: Actin dynamics tune the integrated stress response by regulating eukaryotic initiation factor 2α dephosphorylation
Source: eLife journal article supplement (doi:10.7554/elife.04872), 2015-03-16

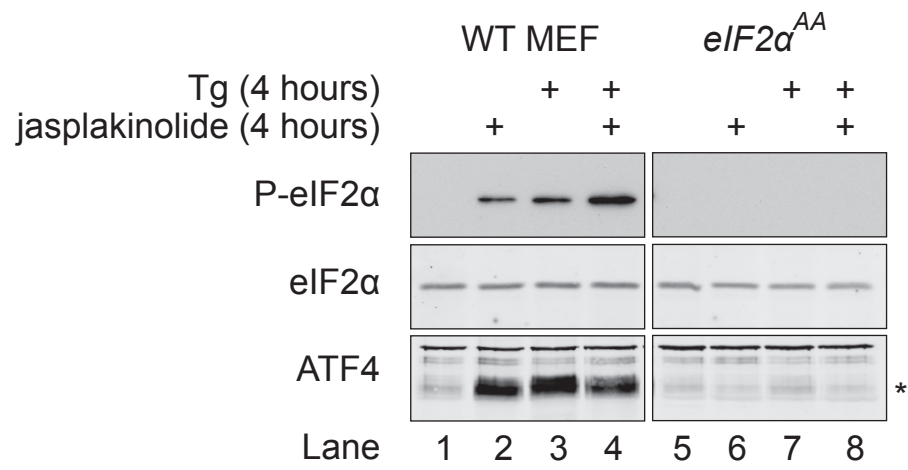

Supplement: supp [file elife-04872-supp-v1.zip › elife_poa_e04872_Figure_6_figure_supplement_1.pdf]

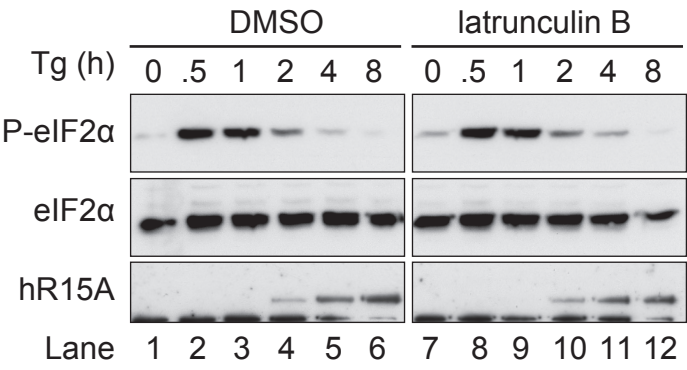

Supplement: supp [file elife-04872-supp-v1.zip › elife_poa_e04872_Figure_5_figure_supplement_1.pdf]

Figure 3 supplement 1

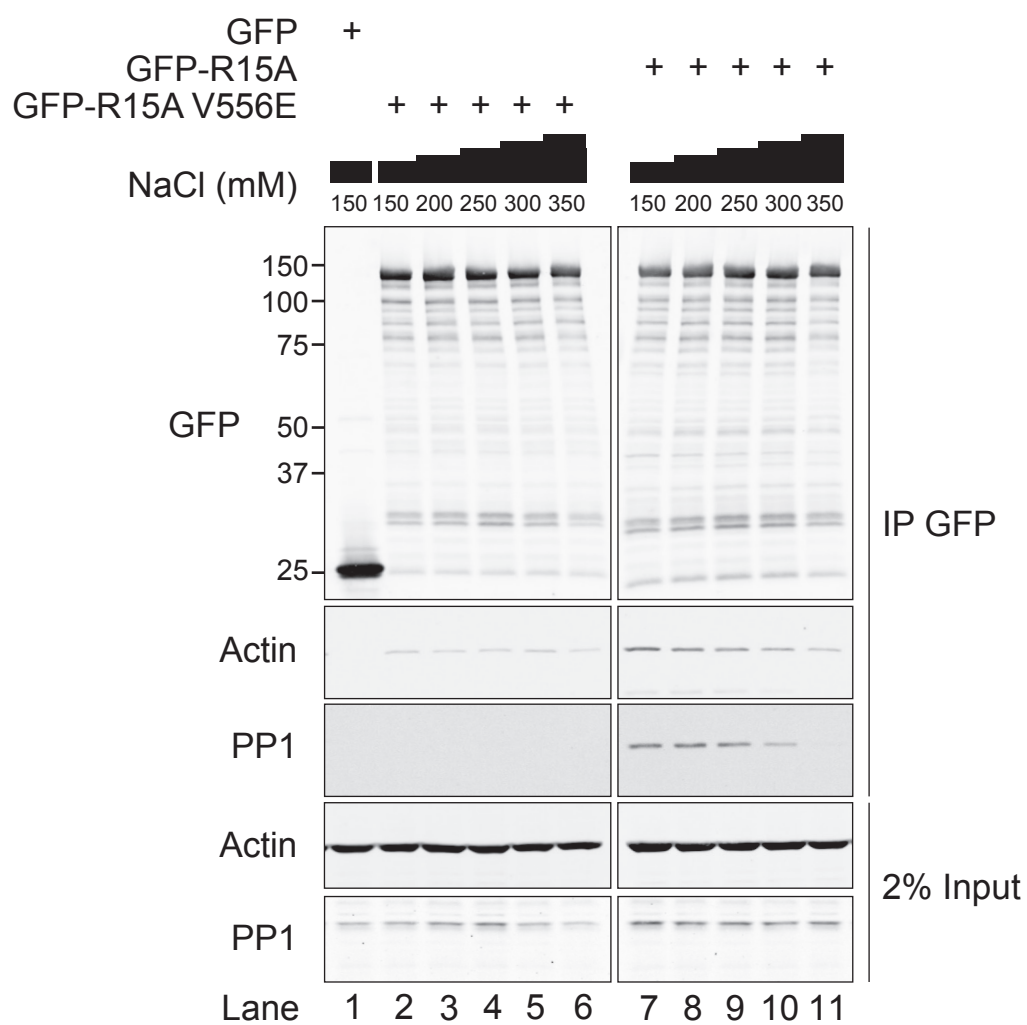

Supplement: supp [file elife-04872-supp-v1.zip › elife_poa_e04872_Figure_3_figure_supplement_1.pdf]

Figure 3 supplement 2

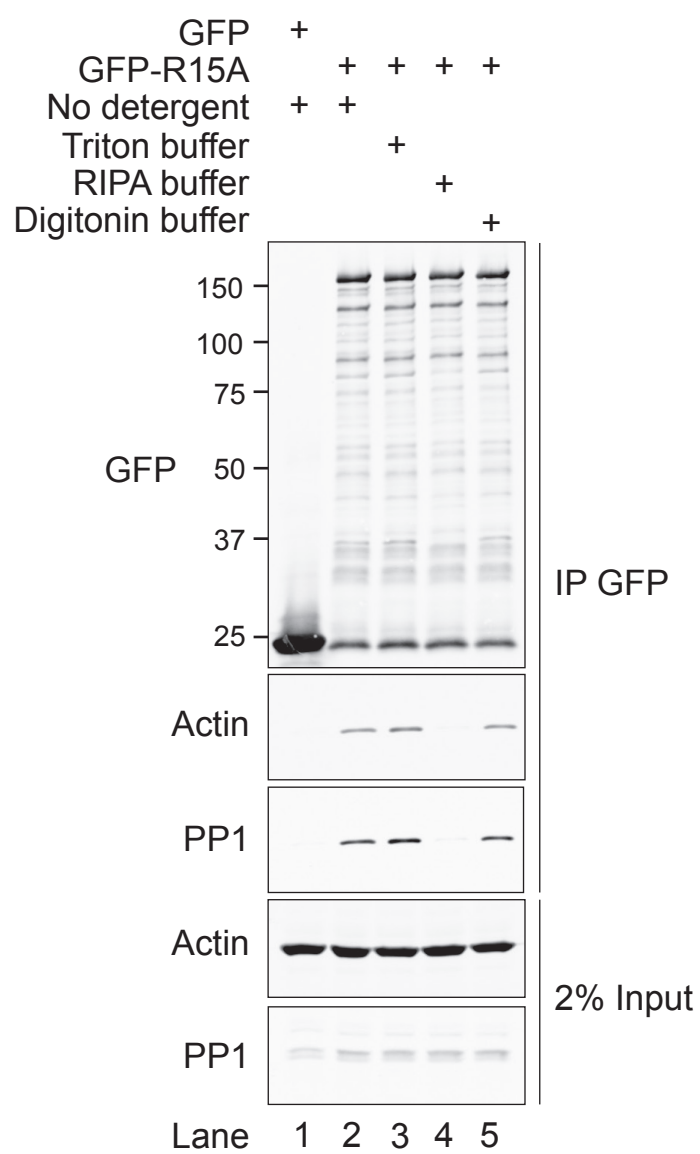

Supplement: supp [file elife-04872-supp-v1.zip › elife_poa_e04872_Figure_3_figure_supplement_2.pdf]

Figure 9 supplement 1

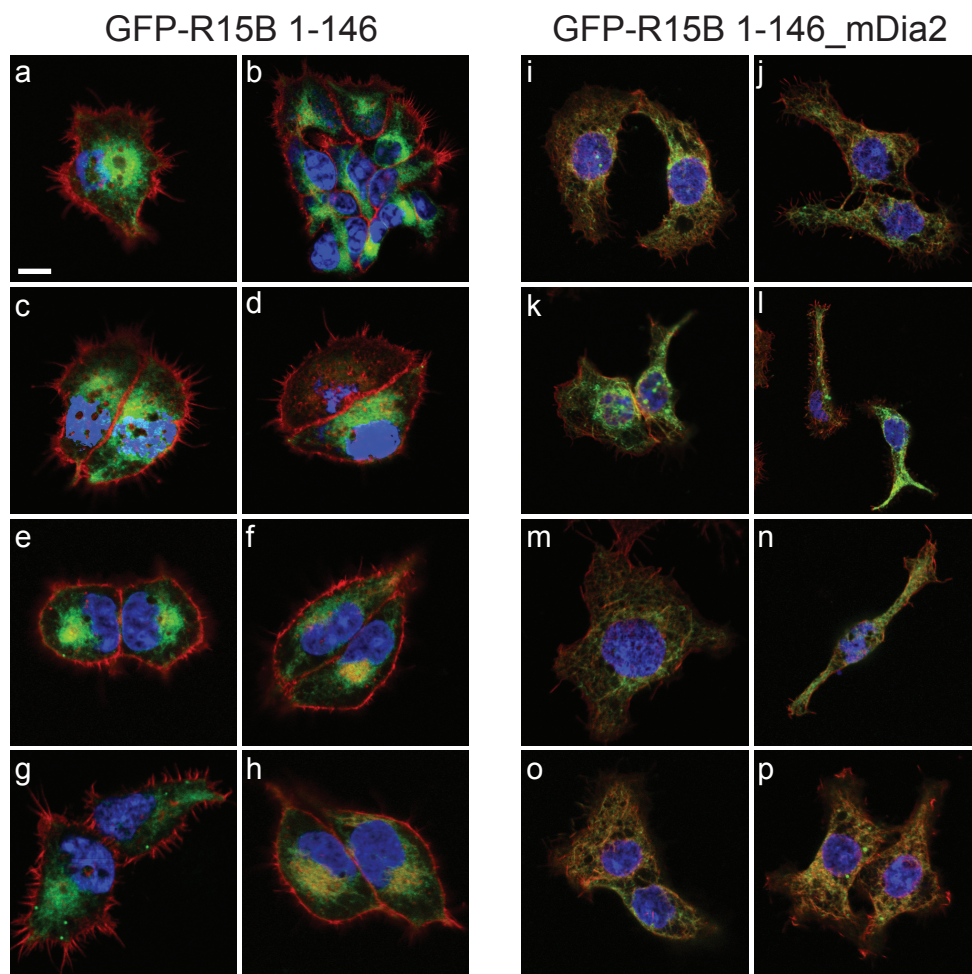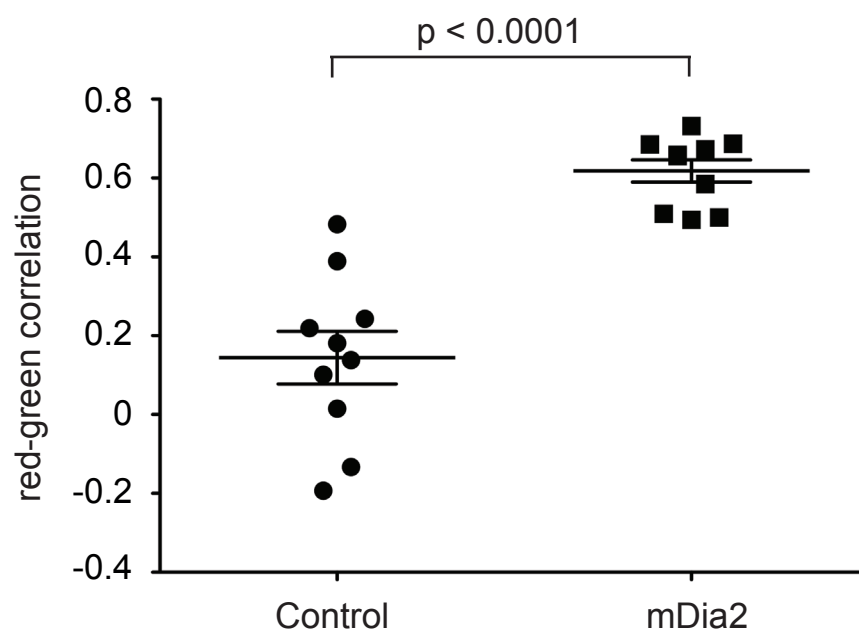

Supplement: supp [file elife-04872-supp-v1.zip › elife_poa_e04872_Figure_9_figure_supplement_1.pdf]
